# Supplementary material
Source: PubMed Central journal article supplement (PMC6664380)
Supplement: jamaneurol-76-1309-s002.pdf [file jamaneurol-76-1309-s002.pdf]

## Supplementary Online Content

Kitagawa K, Yamamoto Y, Arima H, et al. Effect of standard vs intensive blood pressure control on the risk of recurrent stroke: a randomized clinical trial and meta-analysis. *JAMA Neurol*. Published online July 29, 2019. doi:10.1001/jamaneurol.2019.2167

**eFigure 1.** Systolic and Diastolic Blood Pressure by Randomized Groups

**eFigure 2.** Effects of Intensive Blood Pressure Treatment on Recurrent Stroke by Subgroups

**eFigure 3.** Effects of Intensive Blood Pressure Lowering on Recurrent Ischemic Stroke and Intracerebral Hemorrhage: Meta-analysis of Randomized Controlled Trials

**eTable.** Serious Adverse Events by Randomized Groups

This supplementary material has been provided by the authors to give readers additional information about their work.

**eFigure 1.** Systolic and Diastolic Blood Pressure by Randomized Groups

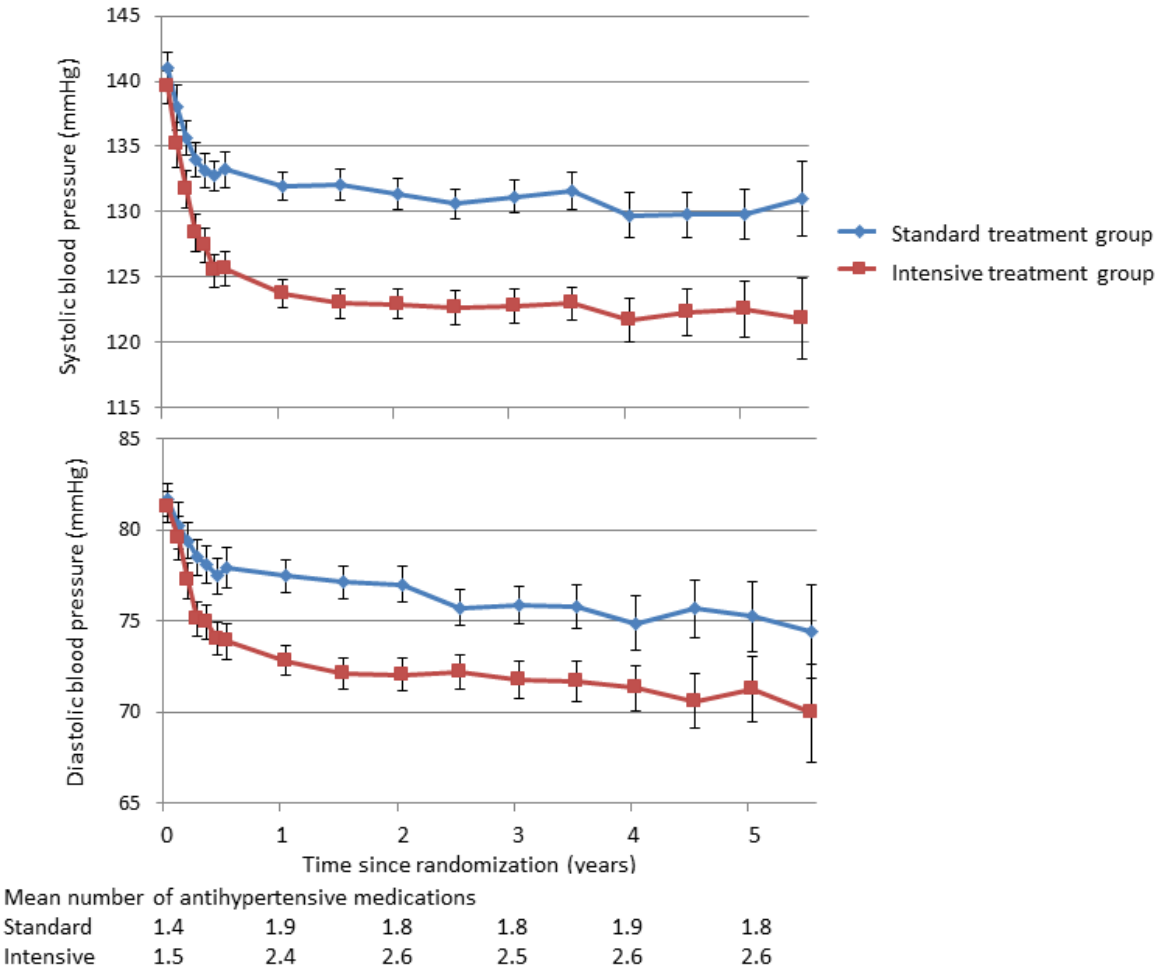

The systolic and diastolic blood pressure target in the intensive treatment group was <120/80 mmHg and the target in the standard treatment group was <140/90 mmHg. Vertical lines represent 95% confidence interval. The mean number of antihypertensive medications at each visit was shown by the randomized groups in the bottom panel.

**eFigure 2.** Effects of Intensive Blood Pressure Treatment on Recurrent Stroke by Subgroups

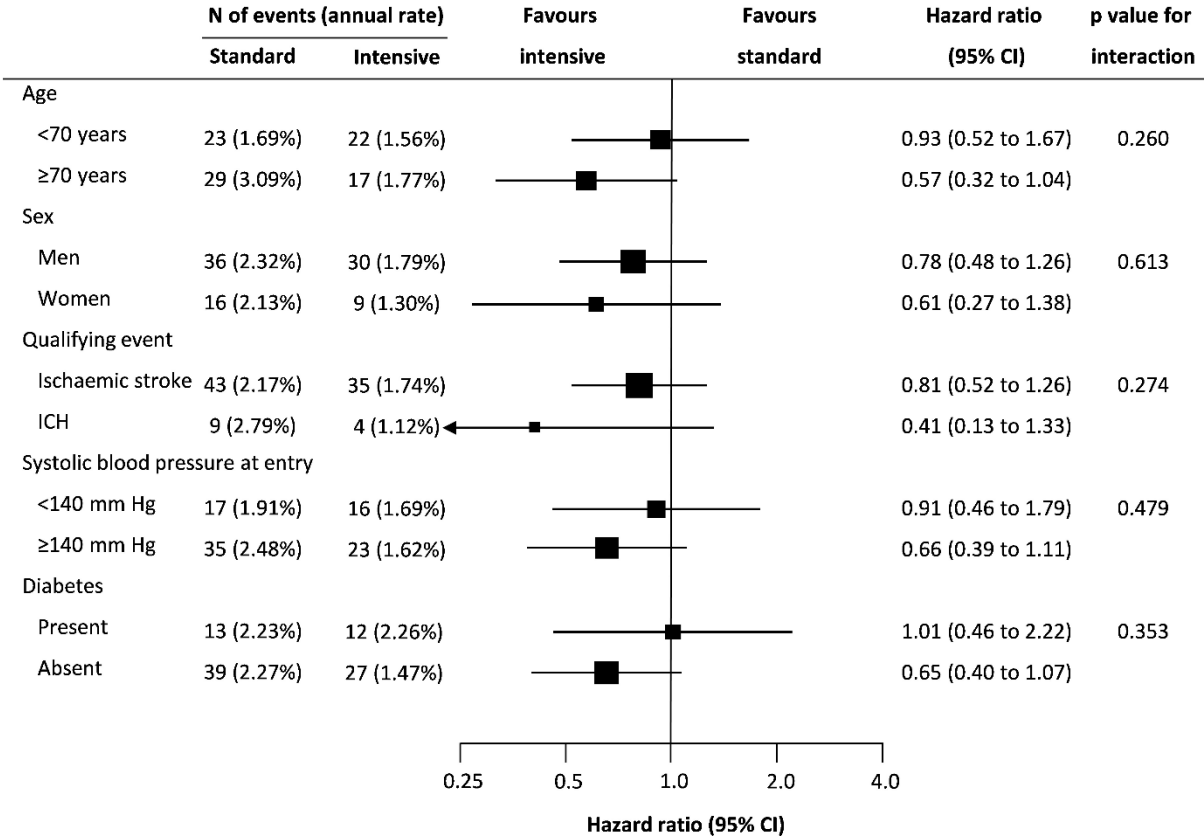

Boxes and horizontal lines represent relative risks and 95% confidence intervals (95% CIs) for each trial, and the size of boxes is proportional to the inverse variance. ICH = intracerebral hemorrhage

**eFigure 3.** Effects of Intensive Blood Pressure Lowering on Recurrent Ischemic Stroke and Intracerebral Hemorrhage: Meta-analysis of Randomized Controlled Trials

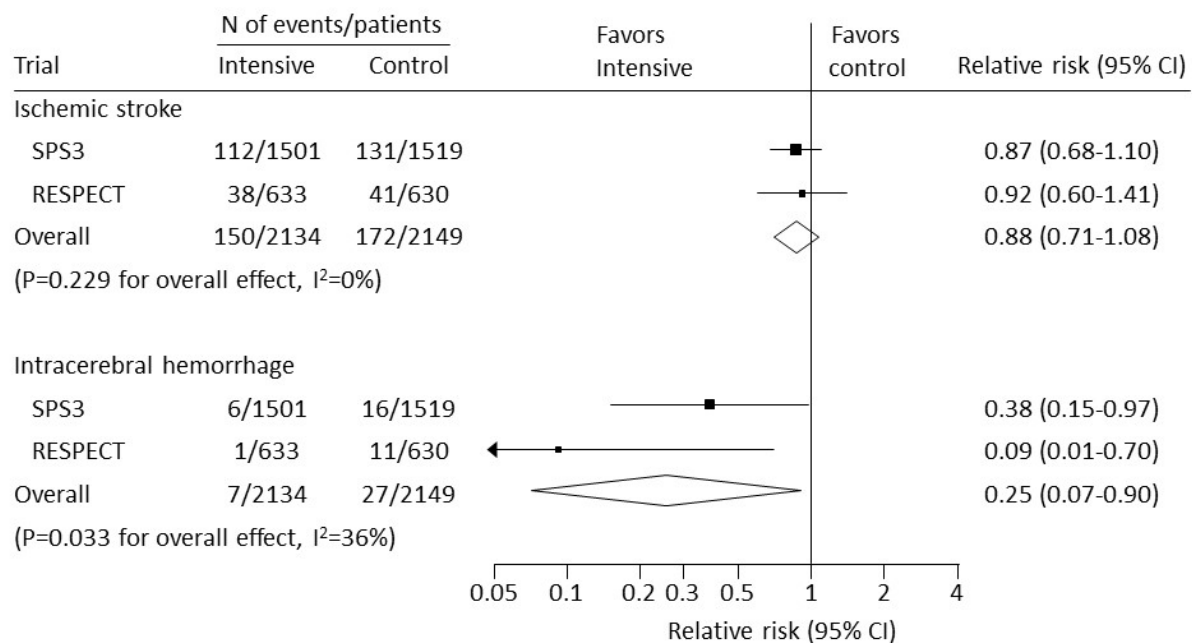

Boxes and horizontal lines represent relative risks and 95% confidence intervals (95% CIs) for each trial; the size of boxes is proportional to the inverse variance; diamonds show the 95% CIs for pooled estimates of effect and are centered on pooled relative risk.

**eTable.** Serious Adverse Events by Randomized Groups

| Serious adverse events                              | N of events (percentage)   |                             | P value |
|-----------------------------------------------------|----------------------------|-----------------------------|---------|
|                                                     | Standard treatment (n=630) | Intensive treatment (n=633) |         |
| Angina pectoris                                     | 5 (0.79%)                  | 3 (0.47%)                   | .506    |
| New-onset or worsening heart failure                | 3 (0.47%)                  | 5 (0.79%)                   | .726    |
| New-onset or worsening of atrial fibrillation       | 10 (1.59%)                 | 5 (0.79%)                   | .206    |
| Coronary intervention or surgery                    | 11 (1.74%)                 | 10 (1.58%)                  | .830    |
| Aortic aneurysm rupture /dissection                 | 2 (0.32%)                  | 0 (0%)                      | .249    |
| New-onset or worsening of peripheral artery disease | 1 (0.16%)                  | 2 (0.32%)                   | .999    |
| Worsening renal function*                           | 1 (0.16%)                  | 6 (0.95%)                   | .124    |
| Hemodialysis treatment                              | 0 (0%)                     | 1(0.16%)                    | .999    |
| New-onset diabetes mellitus                         | 3 (0.48%)                  | 5(0.79%)                    | .726    |
| New-onset gout                                      | 1 (0.16%)                  | 2 (0.32%)                   | .999    |
| New-onset or worsening cognitive function           | 5 (0.79%)                  | 5 (0.79%)                   | .999    |
| Abnormality of serum potassium                      | 0 (0%)                     | 1 (0.16%)                   | .999    |
| Malignant neoplasm                                  | 32 (5.08%)                 | 23 (3.63%)                  | .218    |
| Bone fracture                                       | 17 (2.70%)                 | 13 (2.05%)                  | .467    |
| Pneumonia                                           | 7 (1.11%)                  | 18 (2.84%)                  | .041    |
| Syncope / dizziness                                 | 4 (0.63%)                  | 6 (0.95%)                   | .753    |
| Infectious disease                                  | 7 (1.11%)                  | 5 (0.79%)                   | .578    |
| Collagen or blood disease                           | 3 (0.48%)                  | 2 (0.32%)                   | .686    |
| Endocrine or metabolic disease                      | 2 (0.32%)                  | 2 (0.32%)                   | .999    |
| Psychiatric or neurologic disease                   | 5 (0.79%)                  | 5 (0.79%)                   | .999    |
| Ophthalmic or skin disease                          | 2 (0.32%)                  | 2 (0.32%)                   | .999    |
| Acute or chronic subdural hematoma                  | 1 (0.16%)                  | 4 (0.63%)                   | .374    |
| Other cardiovascular disease                        | 6 (0.95%)                  | 7 (1.11%)                   | .999    |
| Respiratory disease                                 | 6 (0.95%)                  | 4 (0.63%)                   | .546    |
| Gastrointestinal disease                            | 23 (3.65%)                 | 18 (2.84%)                  | .432    |
| Musculoskeletal disorders                           | 8 (1.27%)                  | 8 (1.26%)                   | .999    |
| Kidney / urinary tract                              | 0 (0%)                     | 0 (0%)                      | -       |
| Genital system disease                              | 4 (0.63%)                  | 0 (0%)                      | .062    |
| Injury                                              | 2 (0.32%)                  | 9 (1.42%)                   | .064    |

|                                         |           |           |      |
|-----------------------------------------|-----------|-----------|------|
| Dehydration, abnormal sodium and others | 7 (1.11%) | 8 (1.26%) | .999 |
|-----------------------------------------|-----------|-----------|------|

\*All patients showed increase of serum creatinine  $\geq 2.0$  mg/dl.
